# Supplementary material
Source: Springer Nature journal article supplement (https://www.springermedizin.de/resource/supplementary/12955_2010_737_MOESM1_ESM.pdf/9560892)

## Visit friends

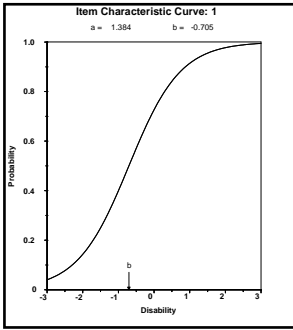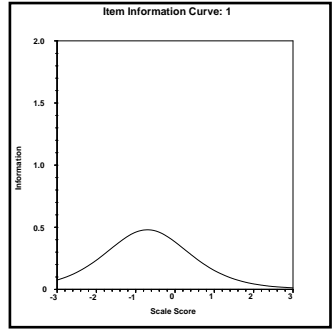

## Travel out of town

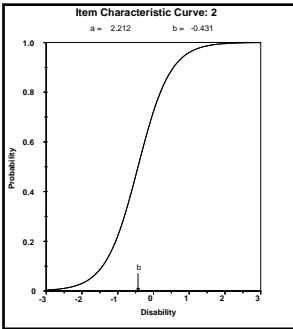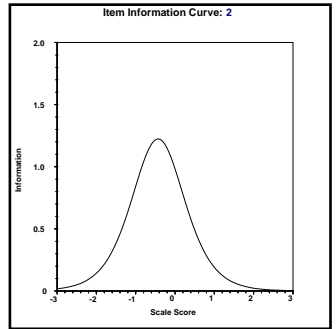

## Go out to public places

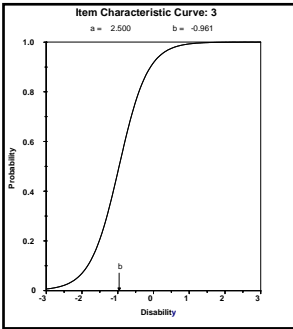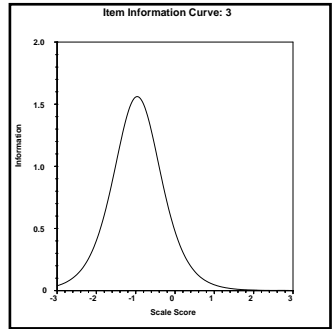

## Invite family and friends into home

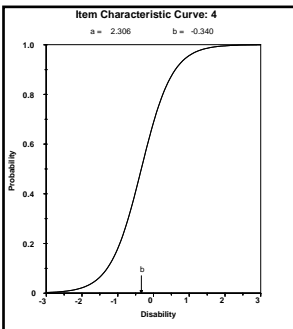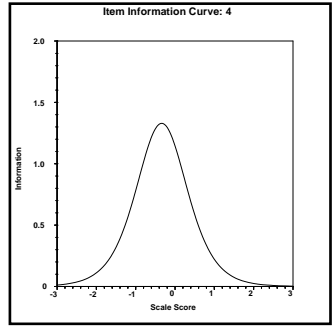

Supplement: MOESM1 [file 9560892]
